# Supplementary material
Source: PubMed Central journal article supplement (PMC3395227)

**Figure S1.** Funnel graph for the assessment of potential publication bias. The funnel graph plots the log adjusted hazard ratio against the standard error of the log adjusted hazard ratio. The dashed line indicates the 95% confidence interval of the log adjusted hazard ratio. The funnel plot shows approximate symmetry, and the result of the Egger test for publication bias is not significant ( $P=0.74$ ).

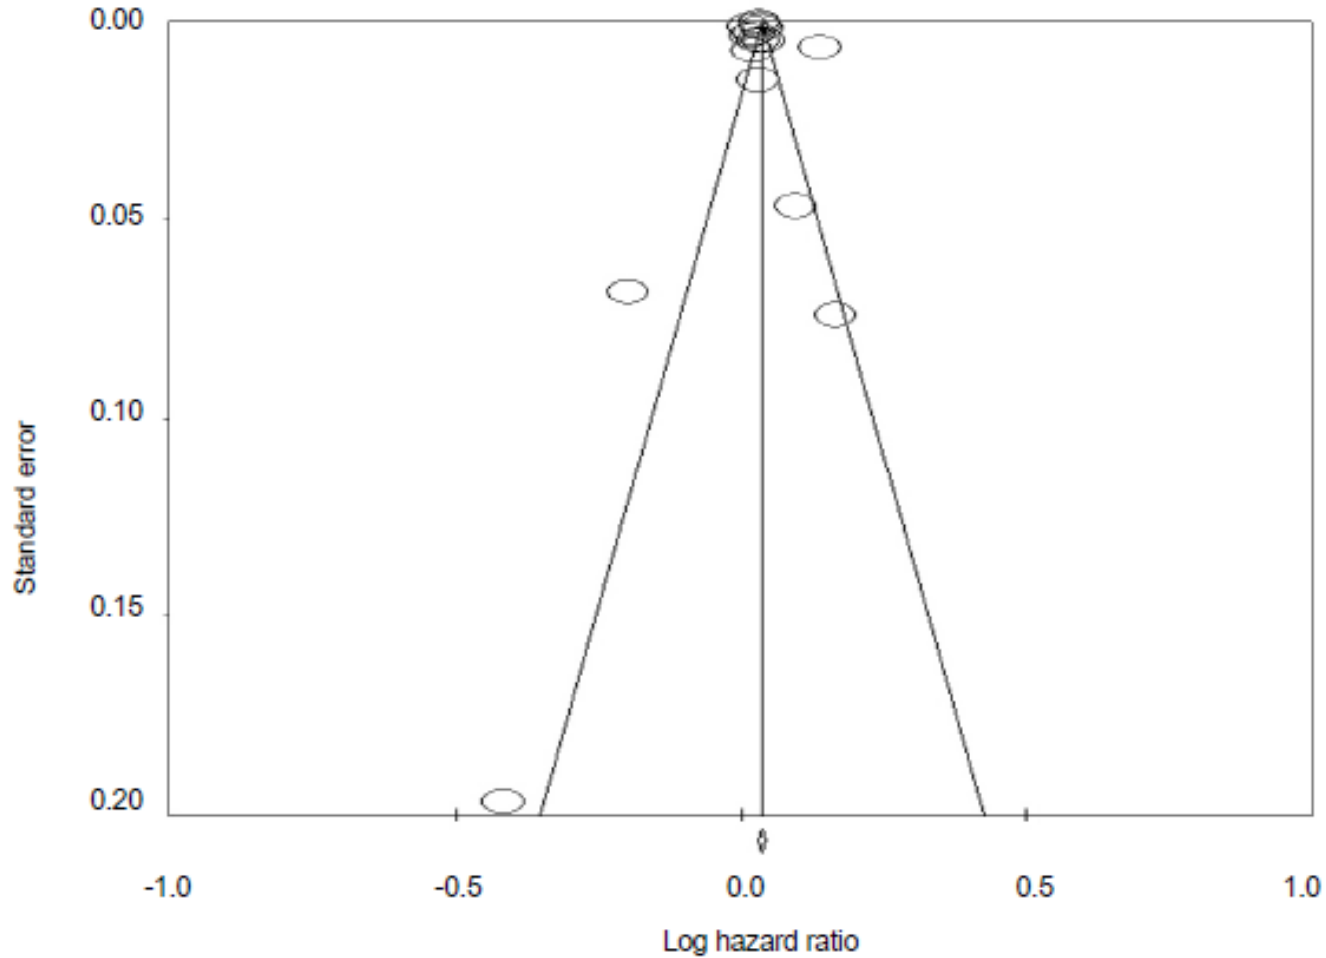

Supplement: NIHMS367907-supplement-01.pdf [file NIHMS367907-supplement-01.pdf]
