# Supplementary material
Source: PubMed Central journal article supplement (PMC3395227)
Supplement: NIHMS367907-supplement-02.pdf [file NIHMS367907-supplement-02.pdf]

**Table S1.** Medical subject headings (MeSH) and keywords used for the systematic literature search

---

"Kidney failure", "Renal dialysis", "Hemodialysis", "Haemodialysis", "Peritoneal dialysis",  
"Kidney artificial", "Ultrafiltration", "Hemofiltration", "Haemofiltration",  
"Haemodialfiltration", "Hemodiafiltration", "CVVH or continuous veno-venous hemofiltration",  
"CAVH or continuous arterio-venous hemodiafiltration", "Early and initiation or initiating",  
"Early and start", "Late and initiation or initiating", "Early-start", "Late-start", "Late and start",  
"Timing or timely or time or early or earlier or late or later and initial or start", "Time factors  
and initial or start".

---
