# Supplementary material
Source: PubMed Central journal article supplement (PMC3395227)
Supplement: NIHMS367907-supplement-03.pdf [file NIHMS367907-supplement-03.pdf]

**Table S2:** Assessment of GFR in the studies included in the meta-analysis

| Author   | GFR Estimating Equation | Number of Variables | Equation                                                                                                                                                                                                           | Unit                       |
|----------|-------------------------|---------------------|--------------------------------------------------------------------------------------------------------------------------------------------------------------------------------------------------------------------|----------------------------|
| Korevaar | -                       | -                   | $\{[(U_{\text{UREA}} \times V) / P_{\text{UREA}}] + [(U_{\text{Cr}} \times V) / S_{\text{Cr}}]\} / 2$<br>(Derived from a 24-hour urine collection)                                                                 | mL/min/1.73 m <sup>2</sup> |
| Traynor  | Cockcroft-Gault         | 4                   | $[(140 - \text{Age}) \times (\text{Wt (Kg)}) \times 0.85 \text{ (if Female)}] / 72 \times \text{sCr (mg/dl)}$                                                                                                      | mL/min                     |
| Beddhu   | MDRD                    | 5                   | $270 \times \text{sCr}^{-1.007} \times \text{Age}^{-0.18} \times 0.775 \text{ (if Female)} \times 1.18 \text{ (if Black)} \times \text{BUN}^{-0.169}$                                                              | mL/min                     |
| Kazmi    | MDRD                    | 4                   | $186 \times \text{sCr [mg/dL]}^{-1.154} \times \text{Age}^{-203} \times 0.72 \text{ (if Female)} \times 1.212 \text{ (if Black)}$                                                                                  | mL/min/1.73 m <sup>2</sup> |
| Wilson   | MDRD                    | 6                   | $170 \times \text{sCr (mg/dL)}^{-0.999} \times \text{Age}^{-0.176} \times \text{BUN (mg/dL)}^{-0.170} \times \text{serum Albumin (d/dL)}^{0.318} \times 0.762 \text{ (if Female)} \times 1.180 \text{ (if Black)}$ | mL/min/1.73 m <sup>2</sup> |
| Tang     | -                       | -                   | $\{[(U_{\text{UREA}} \times V) / P_{\text{UREA}}] + [(U_{\text{Cr}} \times V) / S_{\text{Cr}}]\} / 2$<br>(Derived from a 24 hour urine collection)                                                                 | mL/min/1.73 m <sup>2</sup> |
| Shiao    | MDRD                    | 4                   | $186 \times \text{sCr}^{-1.154} \times \text{Age}^{-0.203} \times 1.212 \text{ (if Black)} \times 0.742 \text{ (if Female)}$                                                                                       | mL/min/1.73 m <sup>2</sup> |
| Sawhney  | MDRD                    | 4                   | $186 \times \text{sCr}^{-1.154} \times \text{Age}^{-0.203} \times 1.212 \text{ (if Black)} \times 0.742 \text{ (if Female)}$                                                                                       | mL/min/1.73 m <sup>2</sup> |
| Coronel  | MDRD                    | 4                   | $170 \times \text{SCr}^{-0.0999} \times \text{Age}^{-0.176} \times \text{BUN}^{-0.170} \times \text{Albumin}^{+0.318}$                                                                                             | mL/min/1.73 m <sup>2</sup> |
| Stel     | MDRD                    | 4                   | $186.3 \times \text{sCr}^{-1.154} \times \text{Age}^{-0.203} \times 1.212 \text{ (if Black)} \times 0.742 \text{ (if Female)}$                                                                                     | mL/min/1.73 m <sup>2</sup> |
| Lassalle | MDRD                    | 4                   | $175 \times \text{SCr}^{-1.154} \times (\text{age})^{-0.203} \times 0.742 \text{ (if female)} \times 1.212 \text{ (if black)}$                                                                                     | mL/min/1.73 m <sup>2</sup> |
| Hwang    | MDRD                    | 4                   | $186 \times \text{SCr}^{-1.154} \times \text{Age}^{-0.203} \times 0.742 \text{ (if Female)} \times 1.212 \text{ (if Black)}$                                                                                       | mL/min/1.73 m <sup>2</sup> |
| Cooper   | MDRD                    | 4                   | $186 \times \text{SCr}^{-1.154} \times (\text{age})^{-0.203} \times 0.742 \text{ (if female)} \times 1.210 \text{ (if black)}$                                                                                     | mL/min/1.73 m <sup>2</sup> |
| Wright   | MDRD                    | 4                   | $175 \times \text{Scr}^{-1.154} \times \text{age}^{-0.203} \times 0.742 \text{ (if female)} \times 1.212 \text{ (if black)}$                                                                                       | mL/min/1.73 m <sup>2</sup> |
| Rosansky | MDRD                    | 4                   | $186 \times \text{SCr} \times \text{Age} \times 0.742 \text{ (if Female)} \times 1.21 \text{ (if Black)}$                                                                                                          | mL/min/1.73 m <sup>2</sup> |
| Clark    | MDRD                    | 4                   | $186 \times \text{SCr}^{-1.154} \times \text{Age}^{-0.203} \times 0.742 \text{ (if Female)} \times 1.21 \text{ (if Black)}$                                                                                        | mL/min/1.73 m <sup>2</sup> |
| Evans    | MDRD                    | 4                   | $186 \times \text{SCr}^{-1.154} \times \text{Age}^{-0.203} \times 0.742 \text{ (if Female)} \times 1.212 \text{ (if Black)}$                                                                                       | mL/min/1.73 m <sup>2</sup> |

MDRD denotes Modification of Diet in Renal Disease; Wt, weight; CrCl, creatinine clearance; sCr, serum creatinine; U<sub>Cr</sub>: urine creatinine; U<sub>UREA</sub>: urine urea, P<sub>UREA</sub>, plasma urea; and BSA: body surface area.
